# Supplementary material for: Inkpen-printed reusable colorimetric sensors for the detection of Hg(ii)
Source: Royal Society of Chemistry journal article supplement (doi:10.1039/c4ra07578a), 2014-09-03
Supplement: c4ra07578a1.pdf [file c4ra07578a1.pdf]

## Supporting Information

### Inkpen-printed reusable colorimetric sensors for detection of Hg(II)

**ChatthaiKaewtong,<sup>\*a</sup> Yuwapon Uppa,<sup>\*b</sup> MangkornSrisa-ard,<sup>a</sup> BunchaPulpoka<sup>c</sup> and ThawatchaiTuntulani<sup>c</sup>**

<sup>a</sup>*Nanotechnology Research Unit and Supramolecular Chemistry Research Unit, Department of Chemistry and Center of Excellence for Innovation in Chemistry, Faculty of Science, Mahasarakham University, Mahasarakham, 44150, Thailand. Fax: 66 0437 54246; Tel: 66 0437 54246; E-mail: [kchatthai@gmail.com](mailto:kchatthai@gmail.com)*

<sup>b</sup>*Department of Chemistry, Faculty of Engineering, Rajamangala University of Technology Isan Khon Kaen Campus, Khonkaen 40000, Thailand. Fax: 66 0437 54246; Tel: 66 0433 36371; E-mail: [note.yy@gmail.com](mailto:note.yy@gmail.com)*

<sup>c</sup>*Supramolecular Chemistry Research Unit, Department of Chemistry, Faculty of Science, Chulalongkorn University, Bangkok 10330, Thailand. Fax: 66 0221 87598; Tel: 66 0221 87643.*

## Contents

|                                                                                                                                                                                                                                                                      |   |
|----------------------------------------------------------------------------------------------------------------------------------------------------------------------------------------------------------------------------------------------------------------------|---|
| <b>Scheme S1</b> Synthetic pathways of branched poly(L-lactide)-maltitol ( <b>B-PLLA-M</b> )                                                                                                                                                                         | 3 |
| <b>Figure S1.</b> <sup>1</sup> H NMR spectra of branched poly(L-lactide)-maltitol                                                                                                                                                                                    | 3 |
| <b>Figure S2.</b> FTIR spectra of branched poly(L-lactide)-maltitol                                                                                                                                                                                                  | 4 |
| <b>Figure S3.</b> TGA curves of branched poly(L-lactide)-maltitol                                                                                                                                                                                                    | 4 |
| <b>Figure S4.</b> The variation weigh ratio of the composition of the binder (branched poly(L-lactide)-maltitol) and the chemosensor ( <b>L2</b> ) in the present of Hg <sup>2+</sup> 10 μM in acetone solution; λ <sub>ex</sub> = 520 nm, λ <sub>ex</sub> = 580 nm. | 5 |
| <b>Table S1.</b> Solubility properties of mixing components (branched poly(L-lactide)-maltitol) 0.17 g and the chemosensor ( <b>L2</b> ) 0.21 g in various solvent.                                                                                                  | 5 |
| <b>Figure S5.</b> A facile pen-on-paper paradigm of inkpen-printed based reversible biodegradable-colorimetric sensor ( <b>IRBS</b> )                                                                                                                                | 6 |
| <b>Figure S6.</b> The cross-sectional SEM images of <b>IRBS</b> on paper (a, b) before and (c, d) after addition of Hg <sup>2+</sup> .                                                                                                                               | 7 |
| <b>Figure S7.</b> Fluorescence imaging observation of <b>IRBS</b> paper sensor before and after treated with Hg <sup>2+</sup> ion solutions of various concentrations (4.0 ×10 <sup>-8</sup> M to 1.0 ×10 <sup>-6</sup> M).                                          | 8 |
| <b>Figure S8.</b> The response calibration curves of the <b>IRBS</b> paper sensors for detection of Hg <sup>2+</sup> (average responses and standard deviation for n = 3 paper sensors).                                                                             | 8 |

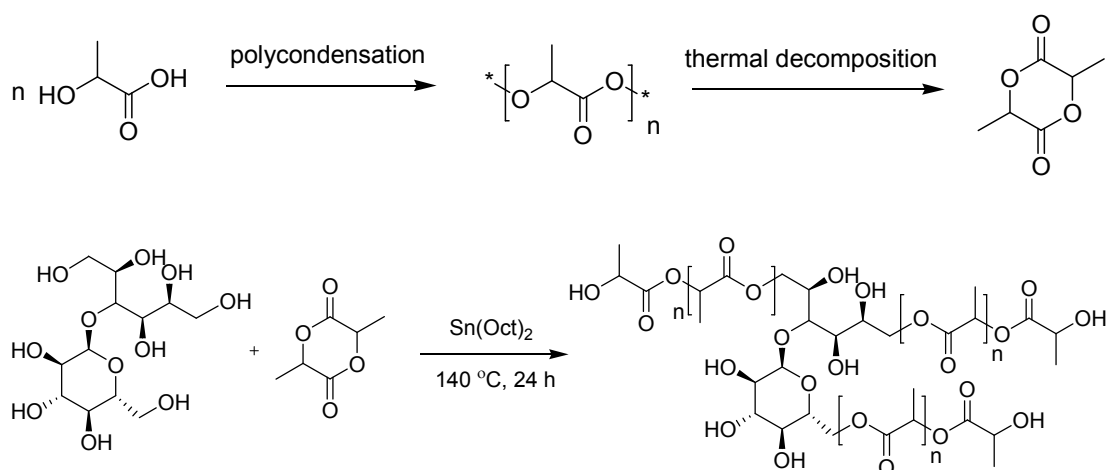

**Scheme S1.** Synthetic pathways of branched poly(L-lactide)-maltitol (**B-PLLA-M**)

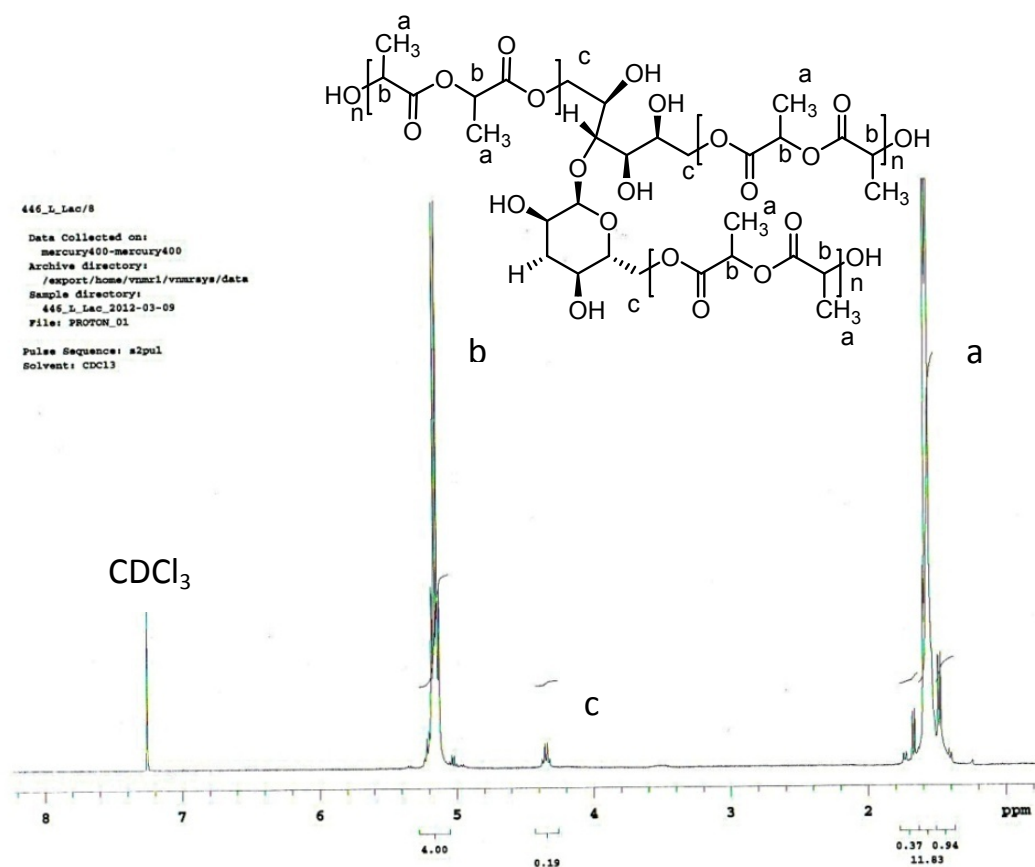

**Figure S1.** <sup>1</sup>H NMR spectra of branched poly(L-lactide)-maltitol

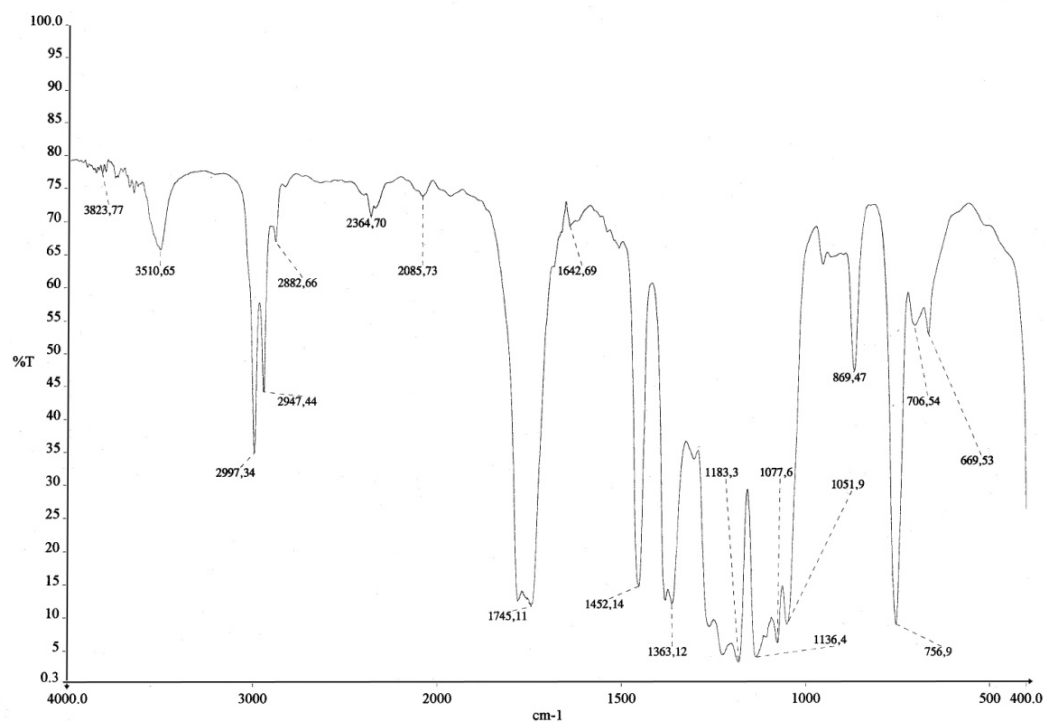

**Figure S2.** FTIR spectra of branched poly(L-lactide)-maltitol

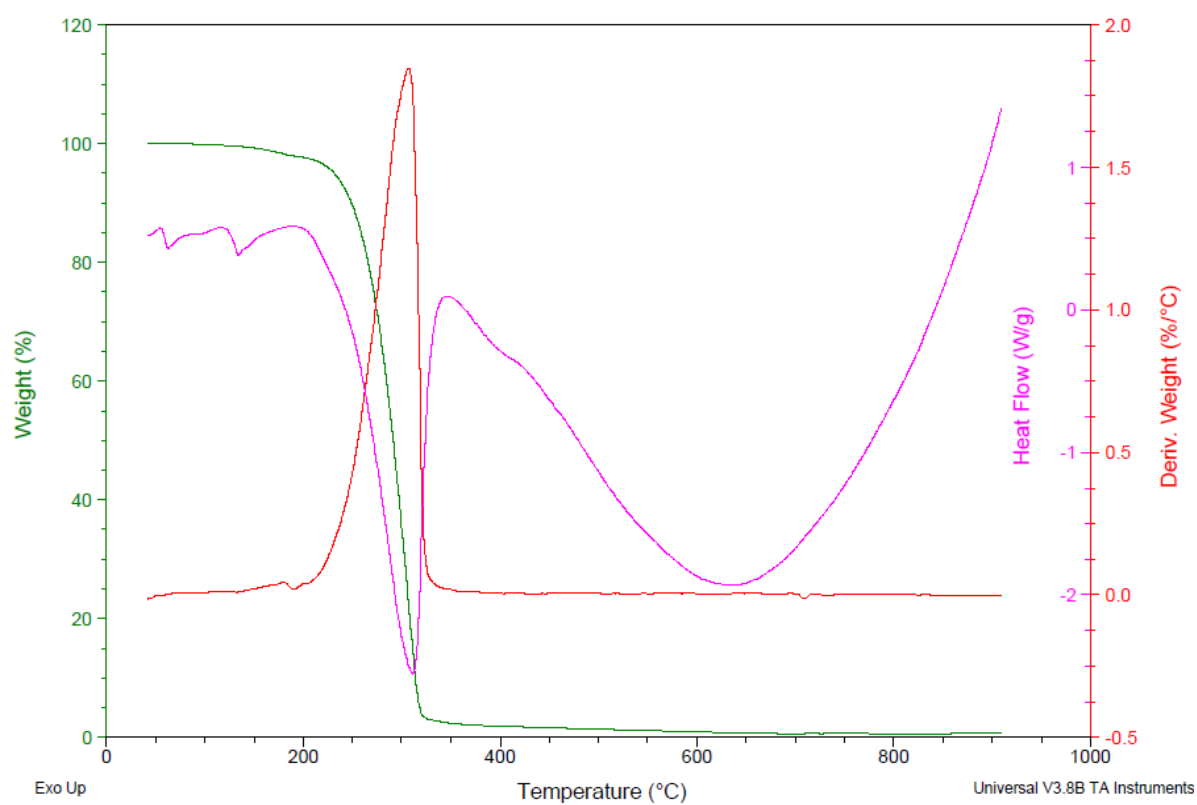

**Figure S3.** TGA curves of branched poly(L-lactide)-maltitol

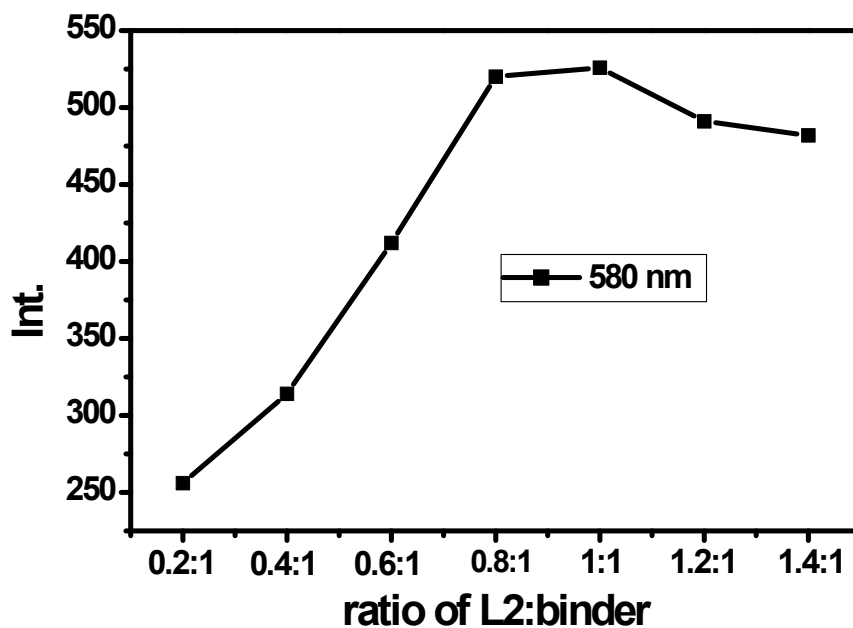

**Figure S4.** The variation weigh ratio of the composition of the binder (branched poly(L-lactide)-maltitol) and the chemosensor (**L2**) in the presence of  $\text{Hg}^{2+}$  10  $\mu\text{M}$  in acetone solution;  $\lambda_{\text{ex}}$ = 520 nm,  $\lambda_{\text{em}}$ = 580 nm.

**Table S1.** Solubility properties of mixing components (branched poly(L-lactide)-maltitol) 0.17 g and the chemosensor (**L2**) 0.21 g in various solvent.

| Solvent           | Mixing components |
|-------------------|-------------------|
| H <sub>2</sub> O  | insoluble         |
| Acetone           | soluble           |
| Acetonitrile      | partially soluble |
| Chloroform        | soluble           |
| Diethyl ether     | insoluble         |
| Dimethylformamide | soluble           |
| Ethyl acetate     | partially soluble |
| Hexane            | insoluble         |
| Toluene           | soluble           |
| Tetrahydrofuran   | soluble           |
| Pyridine          | soluble           |

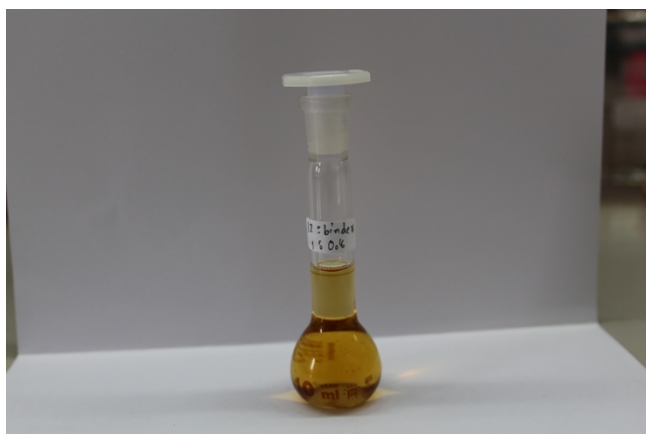

1) mixing of three-component

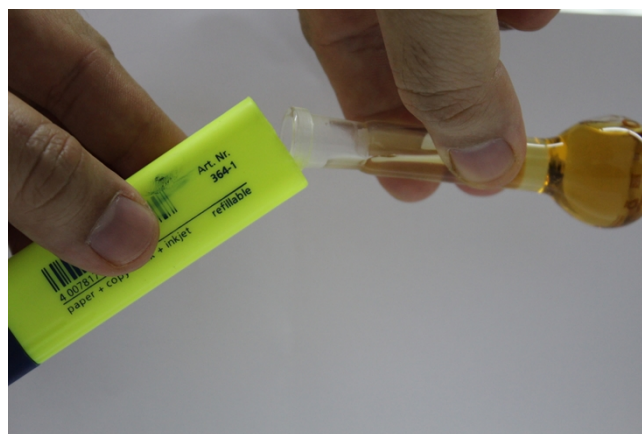

2) filling ink in highlighter pen

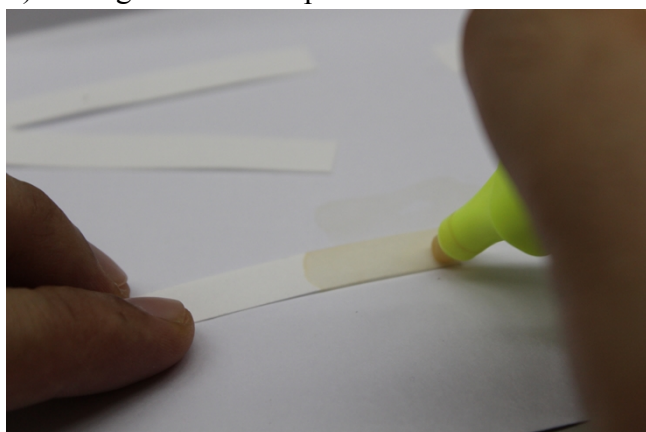

3) direct writing on ordinary paper

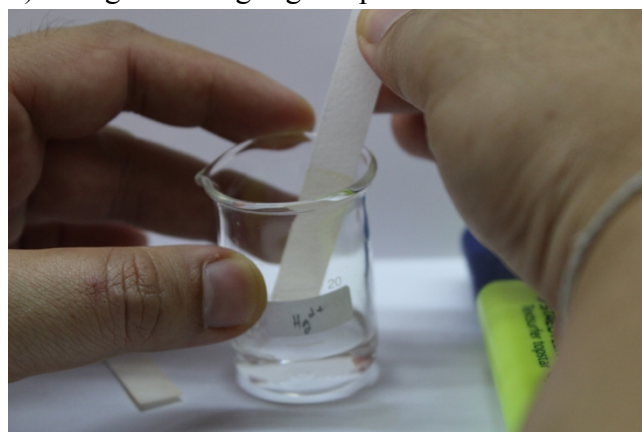

4) dipping in an aqueous solution of  $\text{Hg}^{2+}$

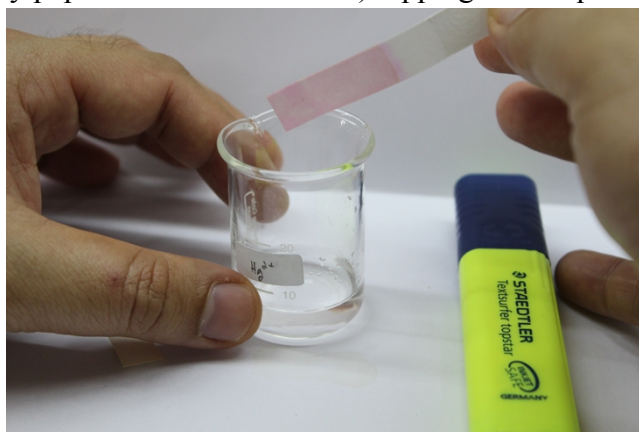

5) measuring the greenish color intensity using Adobe Photoshop

**Figure S5.** A facile pen-on-paper paradigm of inkpen-printed based reversible biodegradable-colorimetric sensor (IRBS)

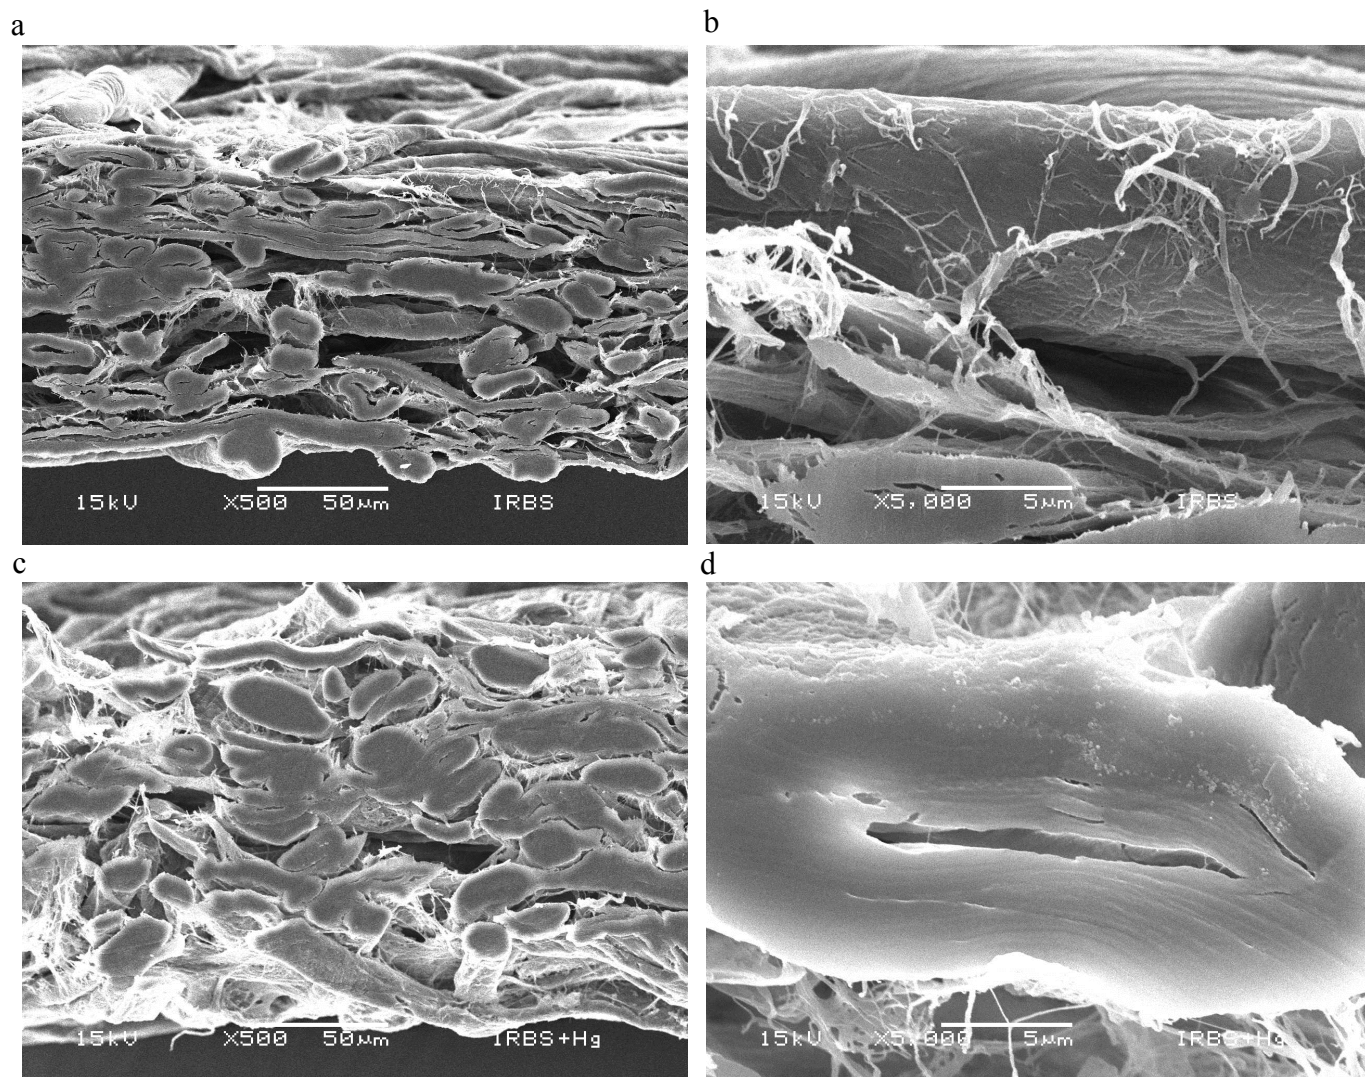

**Figure S6.** The cross-sectional SEM images of **IRBS** on paper (a, b) before and (c, d) after addition of  $\text{Hg}^{2+}$ .

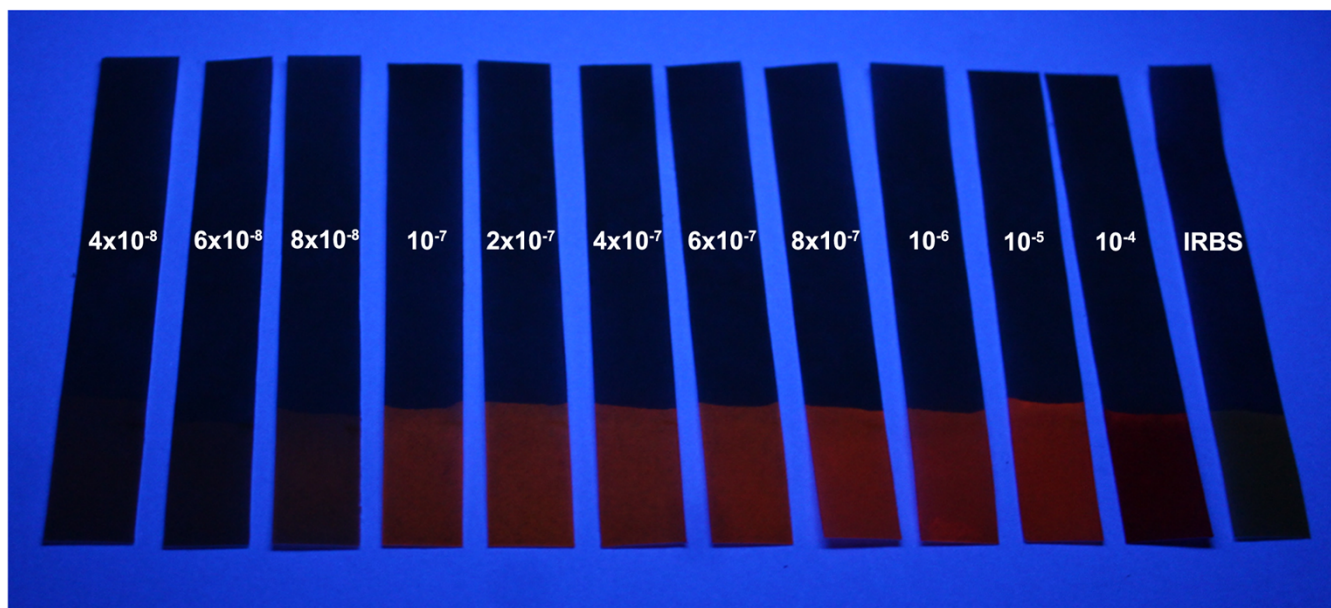

**Figure S7.** Fluorescence imaging observation of **IRBS** paper sensor before and after treated with  $\text{Hg}^{2+}$  ion solutions of various concentrations ( $4.0 \times 10^{-8}$  M to  $1.0 \times 10^{-4}$  M).

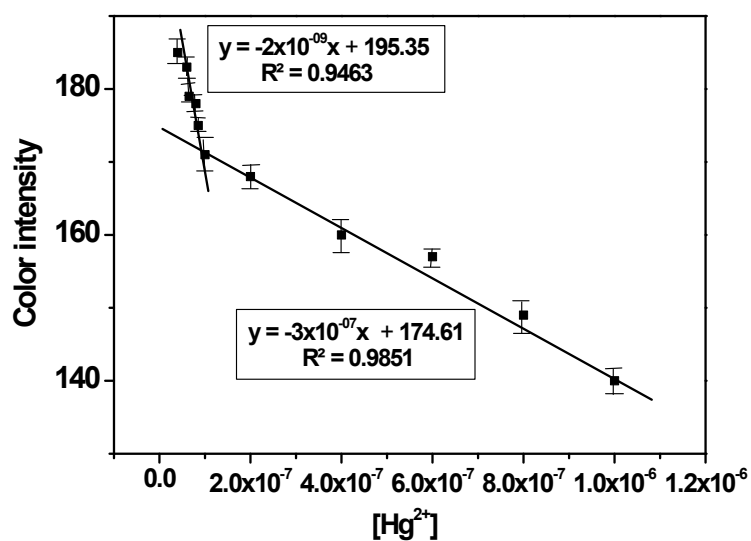

**Figure S8.** The response calibration curves of the **IRBS** paper sensors for detection of  $\text{Hg}^{2+}$  (average responses and standard deviation for  $n = 3$  paper sensors).
